# Supplementary material for: Two-dimensional identification and localization of isomers in crystallin peptides using TWIM-MS
Source: Royal Society of Chemistry journal article supplement (doi:10.1039/d0an01036g), 2020-01-01
Supplement: d0an01036g1.pdf [file d0an01036g1.pdf]

Supporting Information For:

Two-dimensional Identification and Localization of Isomers in Crystallin Peptides Using TWIM-MS

Hoi-Ting Wu, Ryan R. Julian\*

Department of Chemistry, University of California, Riverside, California 92521, United States

**Corresponding Author**

\* Correspondence should be sent to: [ryan.julian@ucr.edu](mailto:ryan.julian@ucr.edu)

Department of Chemistry, University of California, Riverside, 501 Big Spring Road, Riverside,  
California 92521, United States, (951)827-3959



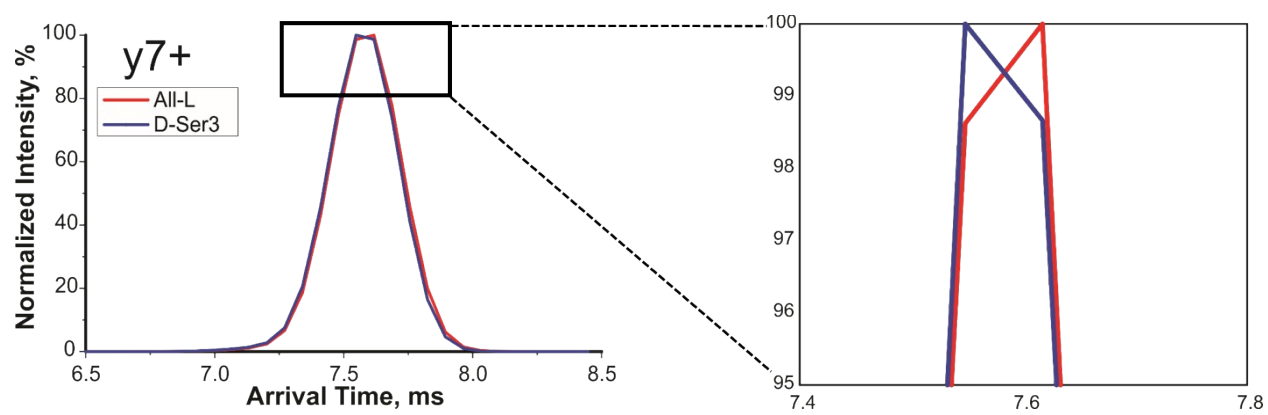

**Figure S1.** ATDs of  $y_7^+$  ions for AP<sub>D/L</sub> SWFDTGLSEMR and the magnified peak maxima.

Full CID spectra:

# APSWFDTGLSEMR

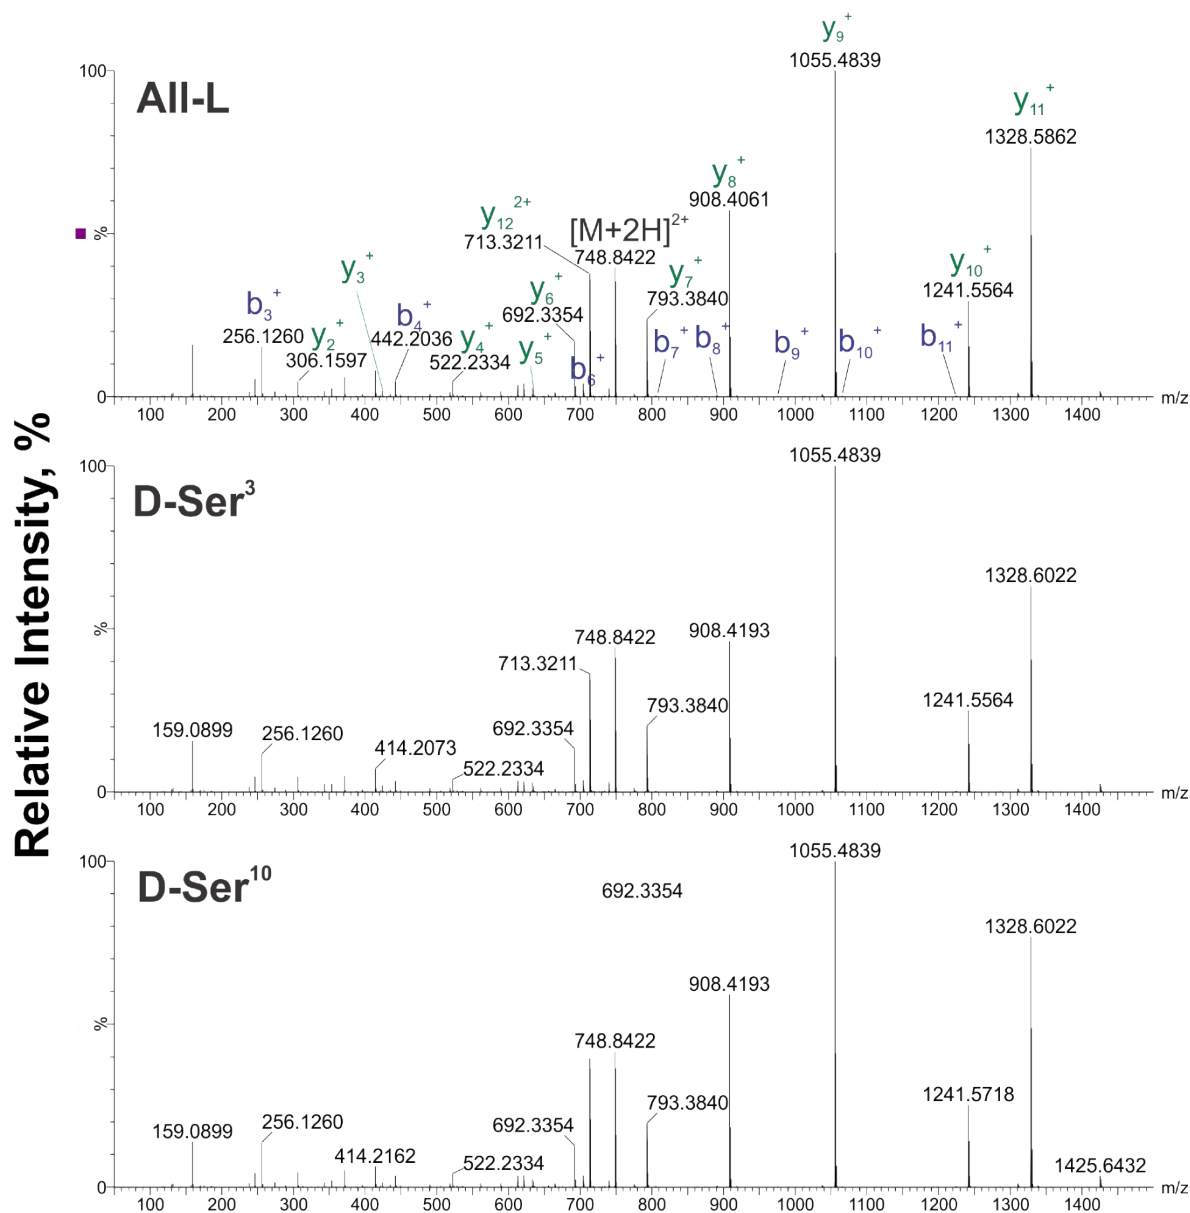

**Figure S2:** The CID spectra for the peptide isomers of APSWFDTGLSEMR: All-L (Top), D-Ser<sup>3</sup> (Middle), and D-Ser<sup>10</sup> (Bottom).

# Full CID Spectra

## GYQYLLEPGDFR

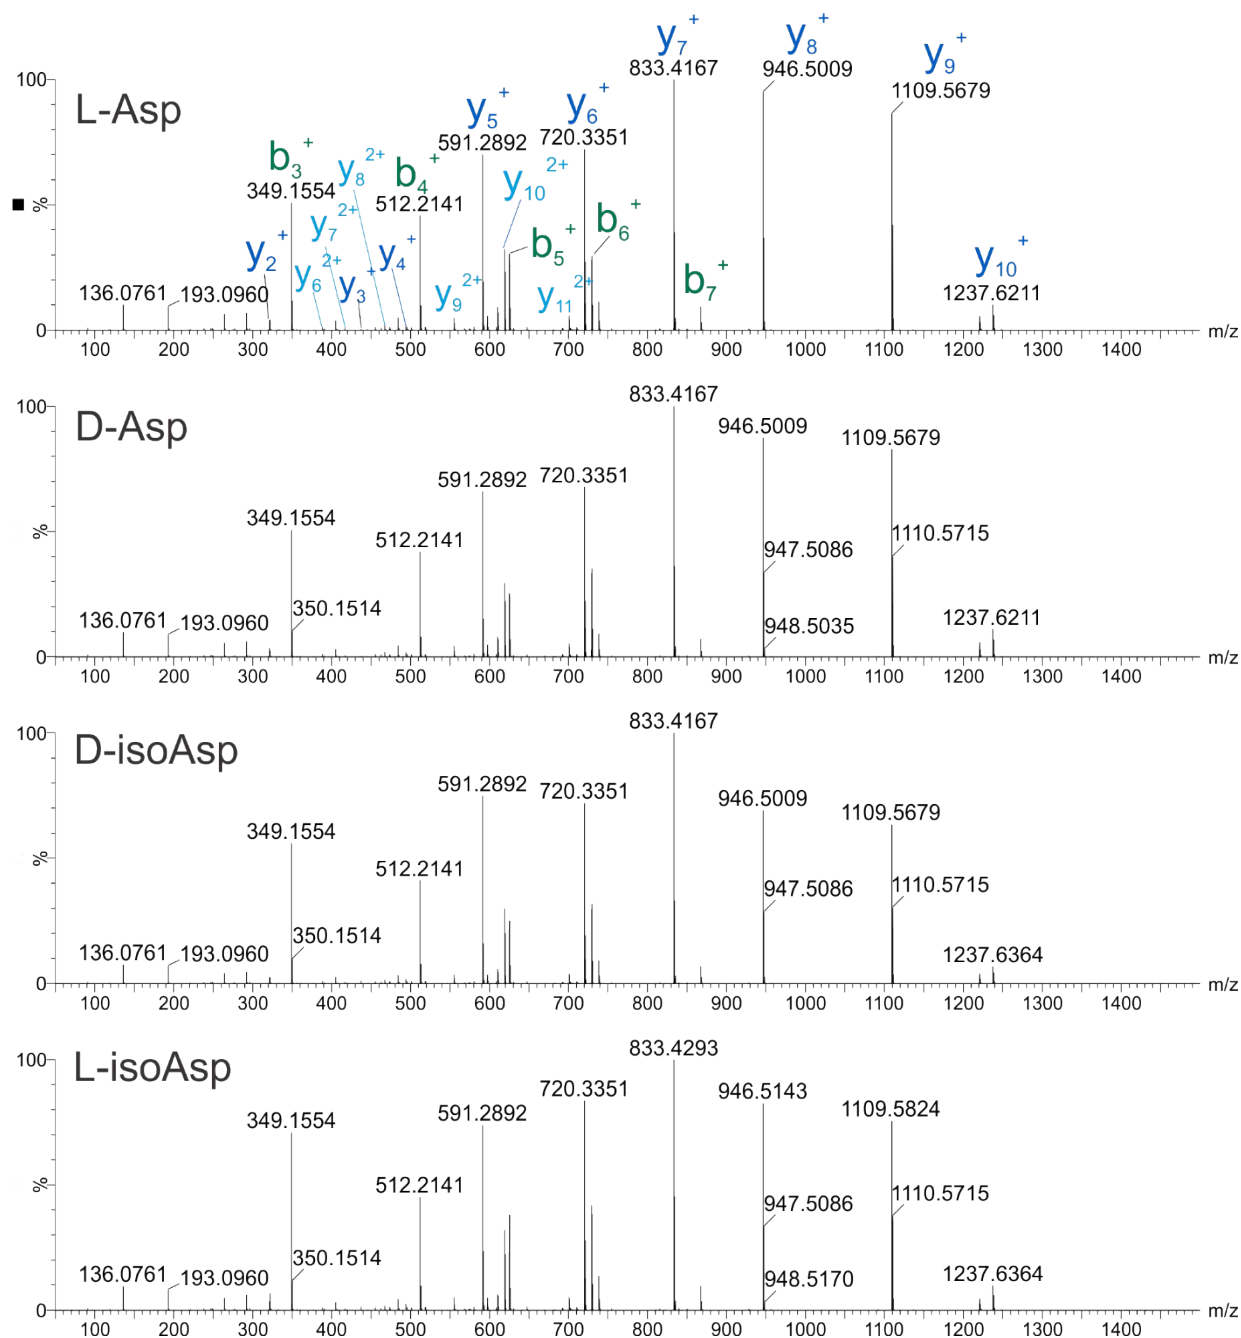

**Figure S3:** The CID spectra for the peptide isomers of GYQYLLEPGDFR: L-Asp (Top), D-Asp (Second), D-isoAsp (Third), and L-isoAsp (Bottom).

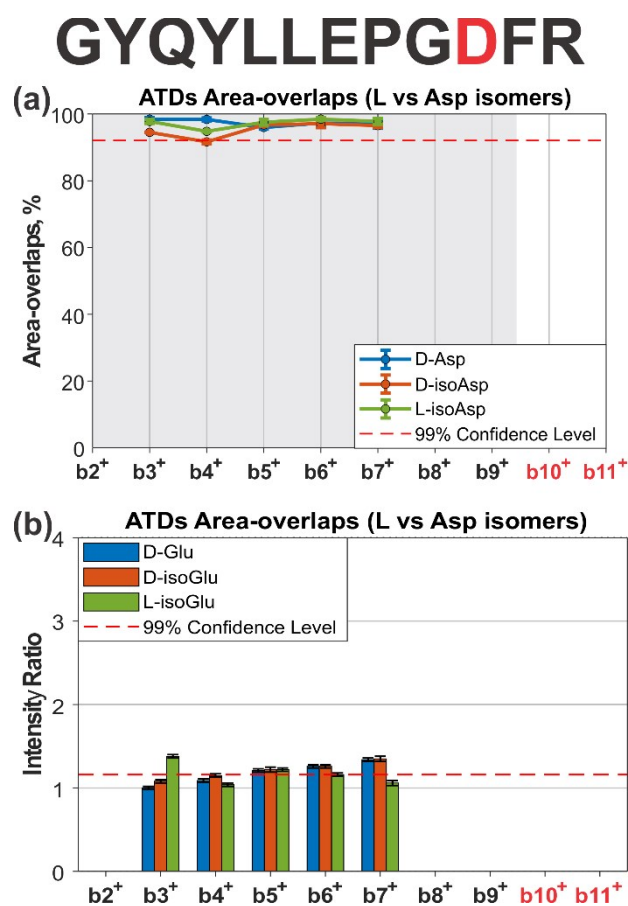

**Figure S4:** Result summary for peptide isomers GYQYLLEPGDFR. **(a)** ATD area-overlaps between L-Asp and D-Asp (blue), D-isoAsp (orange), or L-isoAsp (green) for b-ions. **(b)** CID intensity ratios of the isomeric b-ions.

Full CID Spectra:

# HFSPEDLTVK

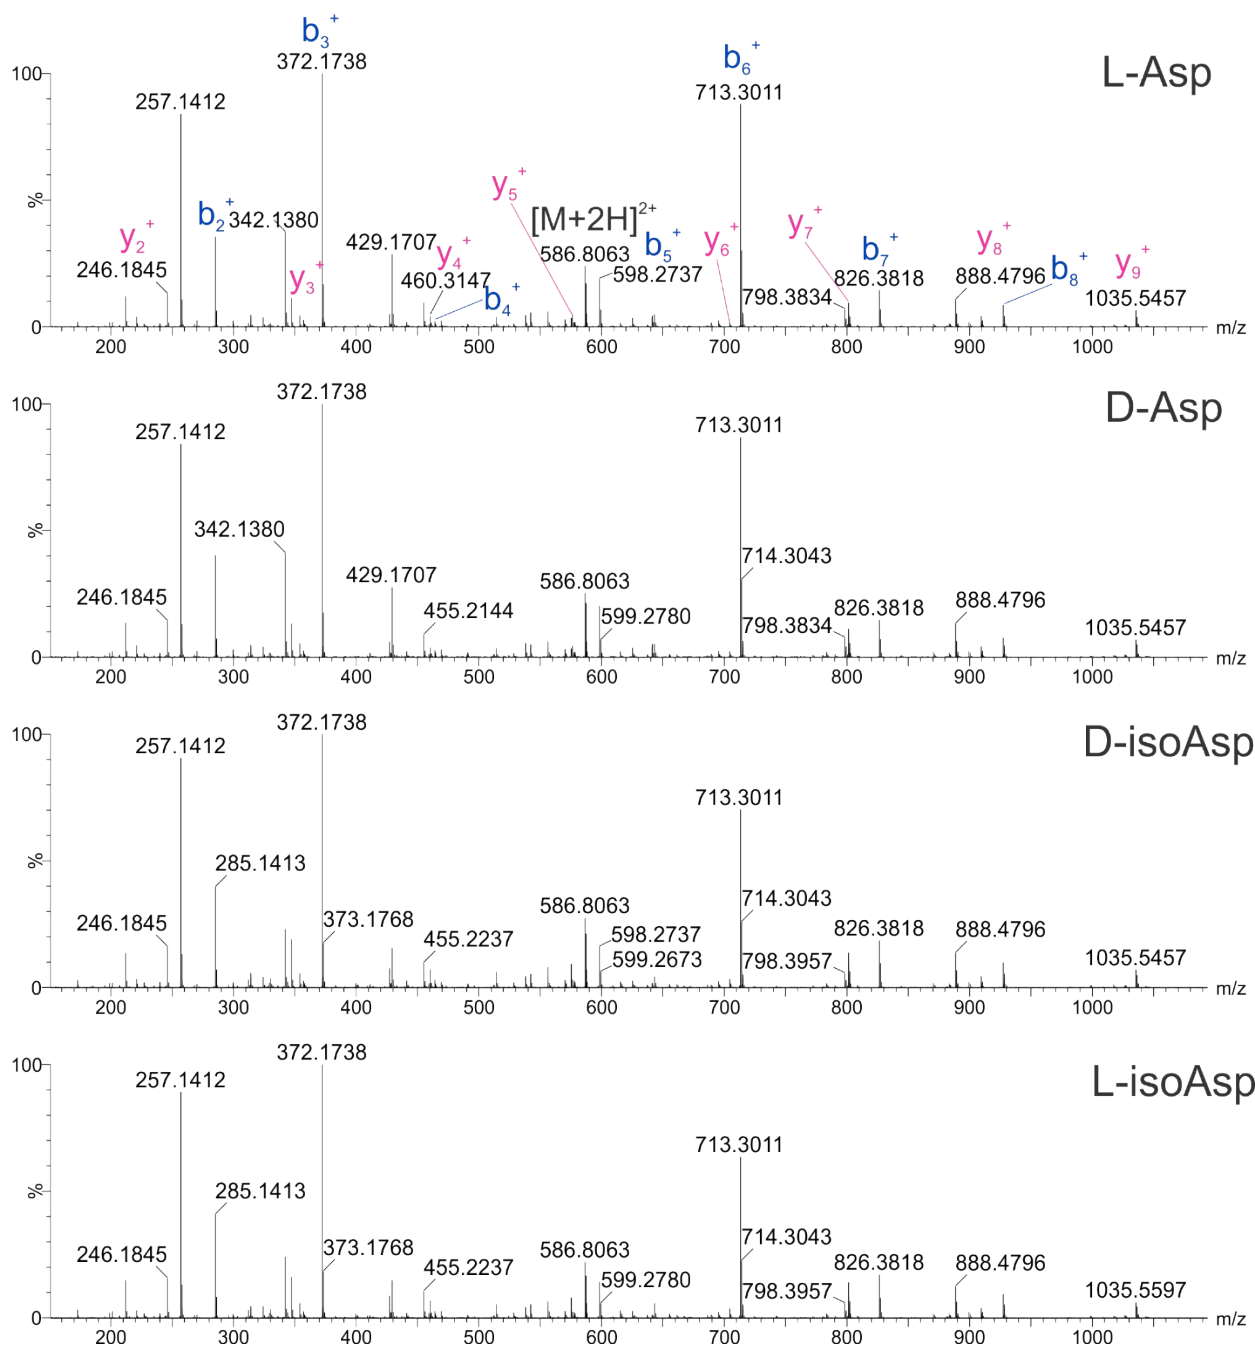

**Figure S5:** The CID spectra for the peptide isomers of HFSPEDLTVK: L-Asp (Top), D-Asp (Second), D-isoAsp (Third), and L-isoAsp (Bottom).

Full CID Spectra:

# HFSPEDLTVK

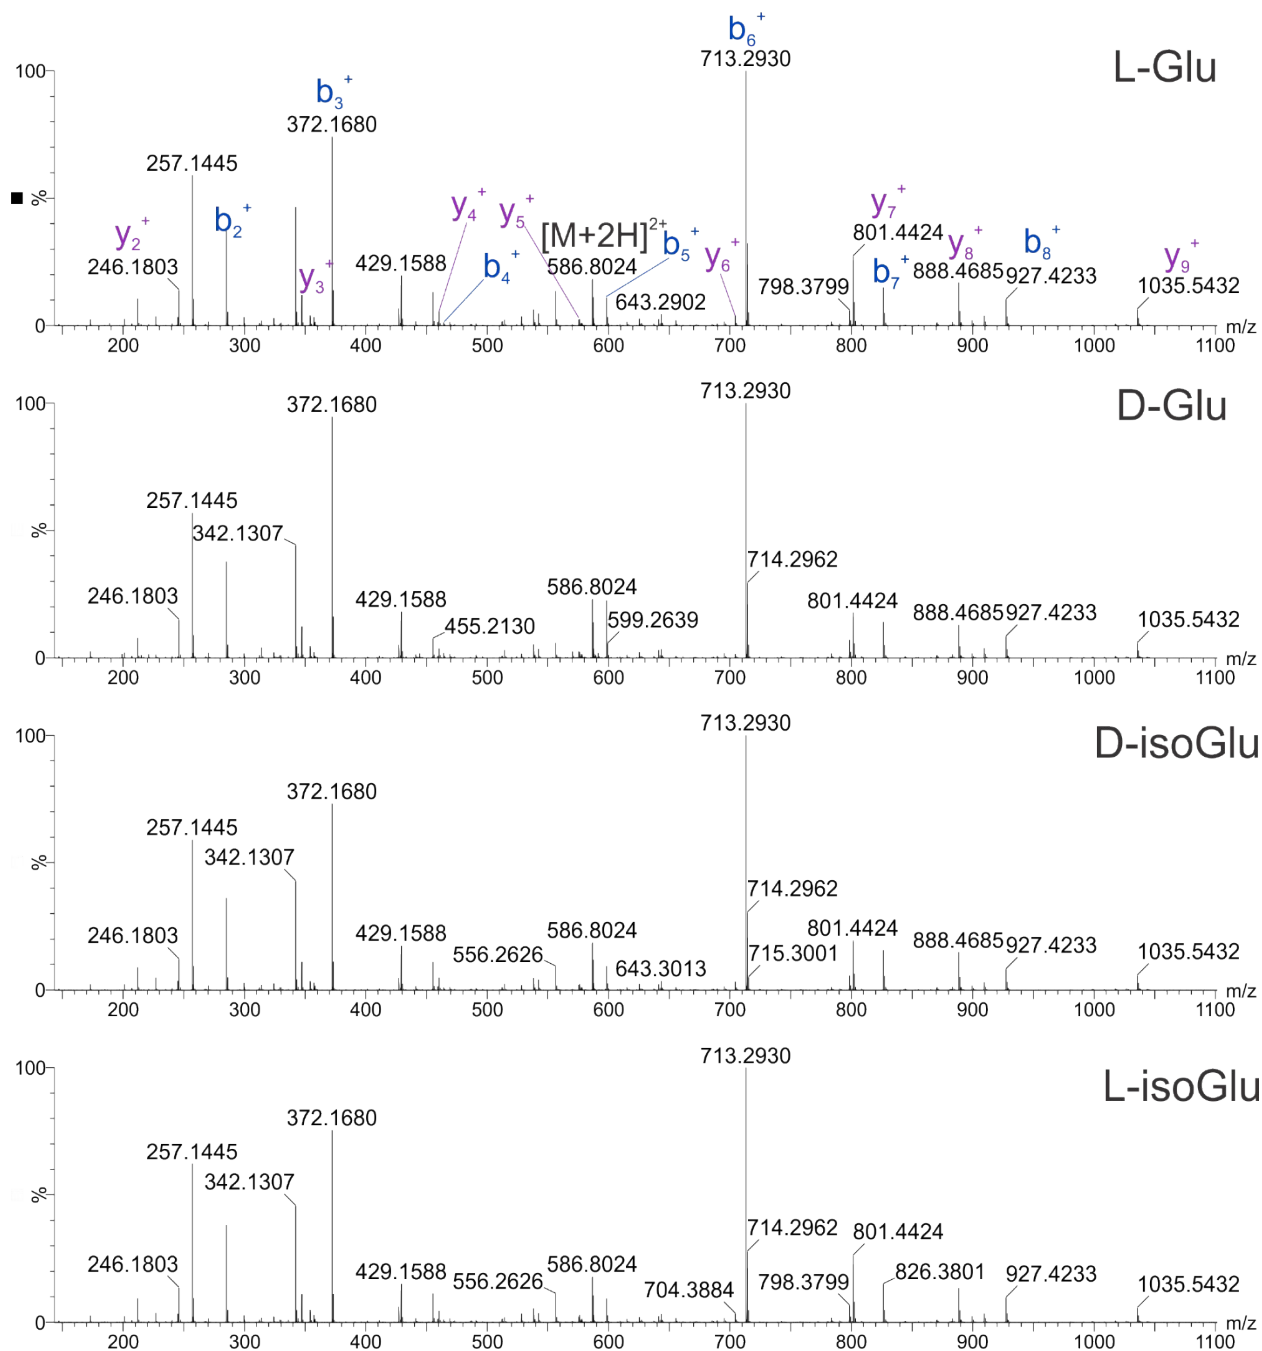

**Figure S6:** The CID spectra for the peptide isomers of HFSPEDLTVK: L-Glu (Top), D-Glu (Second), D-isoGlu (Third), and L-isoGlu (Bottom).
